# Supplementary material for: Group cognitive behavioural therapy with virtual reality exposure versus group cognitive behavioural therapy with in vivo exposure for social anxiety disorder and agoraphobia: a protocol for a randomised clinical trial
Source: HighWire-hosted journal article supplement (doi:10.1136/bmjopen-2021-051147), 2022-02-01
Supplement: bmjopen-2021-051147supp002_data_supplement.pdf [file bmjopen-2021-051147supp002_data_supplement.pdf]

SoREAL 2018 - 2023

1

## Deltagerinformation - SoREAL

**Forsøgets titel:** SoREAL – Virtual Reality til behandling af angst

Vil du deltage i et forsøg, som samtidig er behandling?

Før du beslutter, om du vil deltage i forsøget, skal du fuldt ud forstå, hvad projektet går ud på, og hvorfor vi gennemfører dette. Vi vil derfor bede dig om at læse denne deltagerinformation grundigt.

Du vil blive inviteret til en samtale om forsøget, hvor denne deltagerinformation vil blive uddybet, og hvor du kan stille de spørgsmål, du må have. Du er velkommen til at tage et familiemedlem, en ven eller en bekendt med til samtalen.

Hvis du beslutter dig for at deltage i forsøget, vil vi bede dig om at underskrive en samtykkeerklæring. Husk, at du har ret til betænkningstid, før du beslutter, om du vil underskrive samtykkeerklæringen.

Det er frivilligt at deltage i forsøget. Du kan når som helst og uden at angive en grund trække dit samtykke tilbage, uden at det vil få konsekvenser for din videre behandling

### Formål med forsøget

I behandlingen af angst indgår øvelser hvor man udsætter sig for situationer, som man plejer at undgå. Dette kaldes eksponering. Forskning har vist, at det at blive udsat for og klare vanskelige situationer er et vigtigt element i effektiv behandling af angst. Eksponering i behandlingen sker sædvanligvis ved at man opsøger udfordrende situationer eller skaber dem i rollespil. I det forsøg som vi vil tilbyde dig at deltage i, afprøver vi om eksponering kan forbedres ved at bruge virtual reality. Det vil ske ved at man ser 360 graders film af en række af angstprovokende situationer. Filmene afspilles omkring dig i virtual reality briller, som optager hele dit synsfelt. Man har samtidigt hovedtelefoner på som blokerer for lyd fra virkeligheden. Derved vil filmene opleves meget virkelighedstro, og det vil virke som om man selv er tilstede i den situation, som filmen handler om.

Som deltager afgøres det ved lodtrækning om du bliver tilbudt den sædvanlige behandling, eller behandlingen hvor virtual reality indgår. Dette gøres for at have en kontrolgruppe at sammenligne den nye behandling med og for at minimere fejlkilder i resultaterne.

Det skal understreges, at kun nogle af eksponeringsøvelserne bliver erstattet med virtual reality øvelser, således vil alle der deltager stadig få noget eksponering i virkelige situationer.

**Plan for forsøget**

I psykiatrien i Danmark tilbydes patienter der lider af angst, 14 ugers gruppeterapi (14x2 timer, 1 gang pr. uge) – det såkaldte pakketilbud. Som et led i denne behandling indgår 8 sessioner hvor man arbejder med eksponering for vanskelige situationer. Alle forsøgsdeltagere vil i de 8 sessioner skulle arbejde med vanskelige situationer. Som deltager i dette forsøg afgøres det ved lodtrækning om disse situationer udføres i virkeligheden eller i virtual reality.

Som forsøgsdeltager inviteres du til deltagelse i et interview med en forsker forud for terapiens start, ved terapiens afslutning og et år efter terapiens start. Forskningsinterviewene vil dreje sig om symptomer på psykisk lidelse med fokus på angst og depression, livskvalitet, tilfredshed med behandlingen og eventuelle bivirkninger og inkluderer også besvarelse af en række spørgeskemaer. Til første forskningsinterview vil du yderligere blive tilbudt at gå med pulsur under hele behandlingsforløbet. Du vil efter hver terapisesion med virtual reality eksponering blive bedt om at udfylde spørgeskemaer vedrørende din oplevelse af at bruge virtual reality udstyret.

Hvis du giver tilladelse til det vil der blive indhentet journaloplysninger om tidligere indlæggelser for psykiatriske eller somatiske tilstande, aktuel psykiatrisk behandling, aktuel og tidligere psykofarmakologisk behandling.

Hvis du ønsker at trække dig fra forskningsprojektet, vil det ikke få indflydelse på din øvrige behandling, og hvis du ønsker det, vil de oplysninger, som er indsamlet som del af forskningsprojektet, blive trukket ud af projektet, og dataindsamling og registrering vil herfra foregå som vanligt i sundhedsvæsenet. Det skal understreges at man i forbindelse med publikationer er sikret anonymitet.

**Nytte ved forsøget**

Vi ved aktuelt ikke, om behandling med virtual reality eksponering er mere eller mindre effektiv end den behandling, der sædvanligvis tilbydes. Hvis behandlingen med virtual reality eksponering er ligeså effektiv eller mere effektiv, kan det i fremtiden indgå systematisk i behandlingen af angst, og eventuelt komme til at være et træningstilbud, der kan supplere terapien uden for terapitimerne.

**Bivirkninger, risici, komplikationer og ulemper**

Der kan være bivirkninger ved forsøget i form af ubehag ved at bruge virtual reality briller, så som køresyge. Oplevelse af at blive rundtosset eller køresyg skyldes, at balanceevnen kan forstyrres af de sanseindtryk, som man får, når man har virtual reality udstyr på. Der er intet, der tyder på, at der er langvarige bivirkninger.

Der kan være risici ved forsøget, som vi endnu ikke kender. Vi beder dig derfor om at fortælle, hvis du oplever problemer med dit helbred, mens forsøget står på. Hvis vi opdager bivirkninger, som vi ikke allerede har fortalt dig om, vil du naturligvis blive orienteret med det samme, og du vil skulle tage stilling til, om du ønsker at fortsætte i forsøget.

**Andre behandlingsmuligheder**

Alle der deltager i forsøget vil indgå i den øvrige behandling som sædvanligvis tilbydes til patienter som lider af angst.

**Udelukkelse fra og afbrydelse af forsøg**

Deltagelse i forsøget vil blive afbrudt, hvis deltagelse i gruppebehandlingen for angst afbrydes. Man vil fortsat blive tilbudt deltagelse i forskningsinterview.

**Oplysninger om økonomiske forhold**

Professor Merete Nordentoft har taget initiativ til projektet og har sammen med Nicole Rosenberg, Clas Winding, Kirsten Møller, Ruth Aharoni, Sebastian Swane og Carsten Hjorthøj indsendt en ansøgning til Novo Nordisk Fonden og har modtaget 5 millioner kr. til projektet.

Professor Merete Nordentoft, Benjamin Thorup Arnfred og Peter Bang har indsendt en ansøgning til TrygFonden og har modtaget yderligere 3.5 millioner kr. til projektet. Initiativtagerne til projektet har ingen økonomisk forbindelse med Novo Nordisk Fonden eller TrygFonden.

**Adgang til forsøgsresultater**

Forsøgets resultater vil blive sammenfattet i flere videnskabelige artikler. Vi forventer at kunne offentliggøre en artikel med projektets hovedresultater i 2023. I denne artikel vil vi præsentere resultaterne vedrørende effekten af de to sammenlignede behandlinger målt ved behandlingsafslutning og et år efter start i behandlingen.

Vi håber, at du med denne information har fået tilstrækkeligt indblik i, hvad det vil sige at deltage i forsøget, og at du føler dig rustet til at tage beslutningen om din eventuelle deltagelse.

SoREAL 2018 - 2023

4

Hvis du vil vide mere om forsøget, er du meget velkommen til at kontakte:

**Psykolog Benjamin T. Arnfred**

Mail: [Benjamin.alexander.thorup.arnfred@regionh.dk](mailto:Benjamin.alexander.thorup.arnfred@regionh.dk)

Telefon: +45 21 63 08 78

Region Hovedstadens Psykiatri, Psykiatrisk Center København

Kildegårdsvej 28, 2900 Hellerup
